# Supplementary material for: Overexpression of transient receptor potential mucolipin-2 ion channels in gliomas: role in tumor growth and progression
Source: PubMed Central journal article supplement (PMC5190050; doi:10.18632/oncotarget.9661), 2016-05-27
Supplement: oncotarget-07-43654-s001.pdf [file oncotarget-07-43654-s001.pdf]

## Overexpression of transient receptor potential mucolipin-2 ion channels in gliomas: role in tumor growth and progression

### SUPPLEMENTARY FIGURE

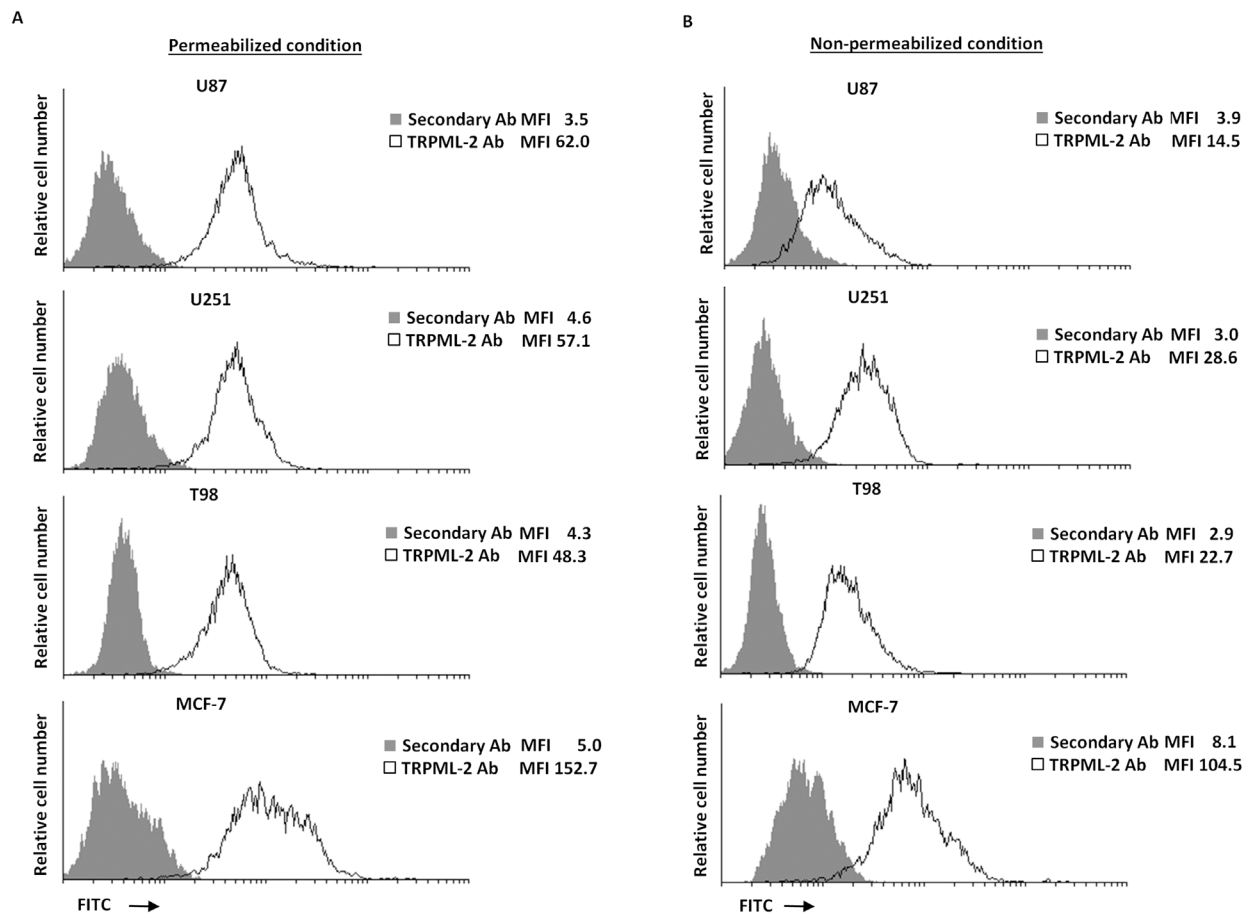

**Supplementary Figure S1: TRPML-2 expression and localization in glioma cell lines.** Cytofluorimetric analysis of TRPML-2 protein expression in permeabilized **A.** or not permeabilized **B.** U87, T98, U251 and MCF-7 cell lines using specific anti-TRPML-2 Ab. MFI= Mean Fluorescence Intensity
